# Supplementary material for: Application of Pinhole Plasma Jet Activated Water against Escherichia coli, Colletotrichum gloeosporioides, and Decontamination of Pesticide Residues on Chili (Capsicum annuum L.)
Source: MDPI journal article supplement (doi:10.3390/foods11182859), 2022-09-15
Supplement: s1 [file s1]

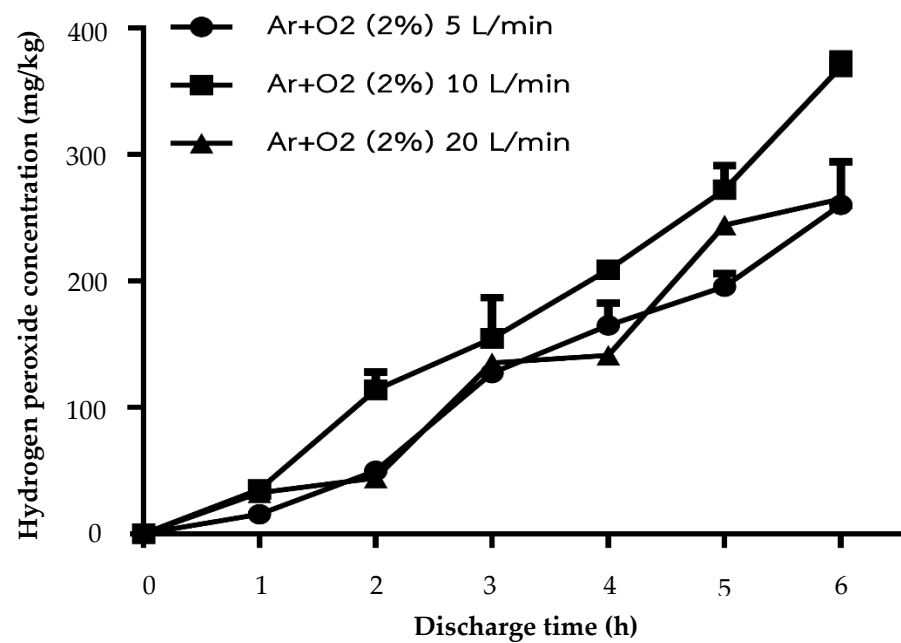

**Figure S1.** H<sub>2</sub>O<sub>2</sub> concentration of PAW produced by different mixture rates of Ar+O<sub>2</sub>.

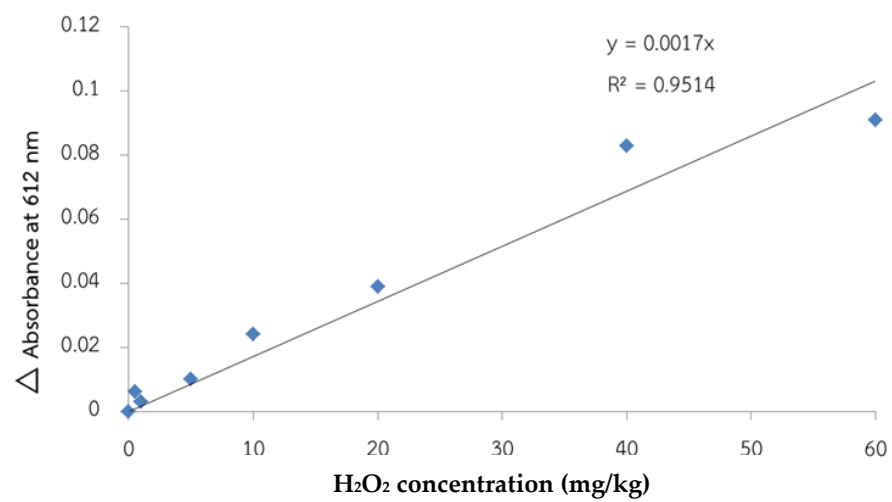

**Figure S2.** Standard curve of hydrogen peroxide measurement.

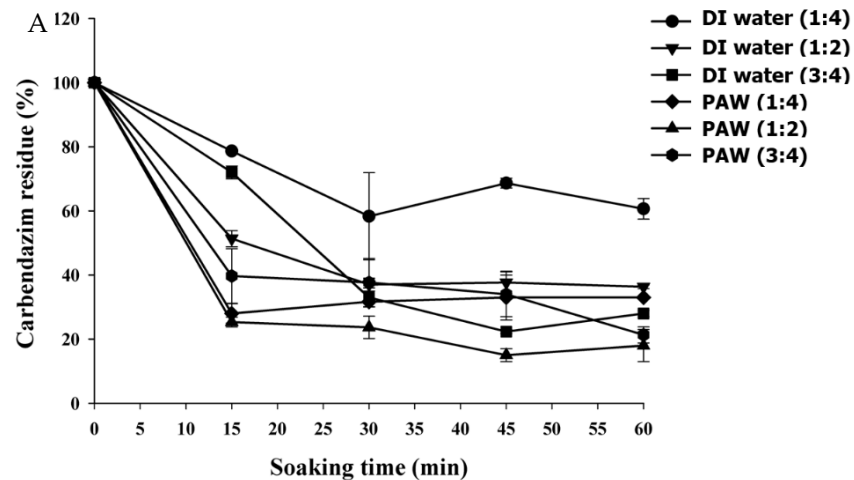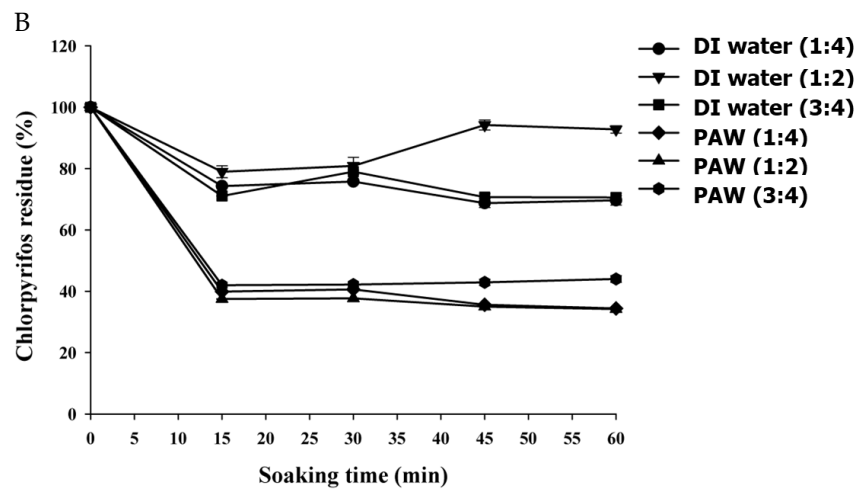

**Figure S3.** Degradation of (A) carbendazim, and (B) chlorpyrifos residues in chili with different ratios of PAW and DI water as a function of treatment time.
